# Supplementary material for: Identification of Seven Additional Genome Segments of Grapevine-Associated Jivivirus 1
Source: MDPI journal article supplement (doi:10.3390/v15010039), 2022-12-22
Supplement: s1 [file s1]

**Table S1.** Primers used for the detection or the molecular characterization of the isolates of GaJV1 in the present study

| Primer name                | Sequence 5'-3'                              | Genome positions | Amplicon size (bp) | Annealing T° |
|----------------------------|---------------------------------------------|------------------|--------------------|--------------|
| <b>RACE primers</b>        |                                             |                  |                    |              |
| GaJV-1 RNA1-3'Race         | TGTTCCCTTGTYAAACCCGATCACGTGGC               | 3523-3550        | 550                | 70°C         |
| GaJV-1 RNA2-3'Race         | GTGTCYTTTTTCGGATCGCGTGC GTTCC               | 2987-3013        | 244                | 70°C         |
| GaJV-1 RNA3-3'Race         | CGCAACTTACGTATGATYTG GATTGGCC               | 1738-1765        | 402                | 70°C         |
| GaJV-1 RNA4-3'Race         | CCGCTTCTTTGCGTAAATTGCTGTCACG                | 1852-1879        | 158                | 70°C         |
| GaJV-1 RNA5-3'Race         | TGTTGGGCGTGGCTCTGCTTGGTTCGCG                | 1642-1668        | 220                | 70°C         |
| GaJV-1 RNA6-3'Race         | GAAGGTGTGTTAGTGTGGAATTCTGTCTG               | 1370-1397        | 294                | 70°C         |
| GaJV-1 RNA7-3'Race         | CGAAGGTCCCGATTTTGATTCTGTGCG                 | 1175-1201        | 475                | 70°C         |
| GaJV-1 RNA8-3'Race         | AAGCTTGGTGGGGTCAATAATTGGTCGCG               | 951-979          | 912                | 70°C         |
| GaJV-1 RNA9-3'Race         | CTGCTGGCGCTTCTGATCGTCTTATGC                 | 1373-1347        | 308                | 70°C         |
| GaJV-1 RNA1-5'Race         | CATCTTGGAATCAACAACATGAGGTACC                | 353-326          | 353                | 70°C         |
| GaJV-1 RNA2-5'Race         | GCAACATCTCAGCAAATTCAGCAGTACTA               | 179-151          | 179                | 70°C         |
| GaJV-1 RNA3-5'Race         | CGAGCATCTTGTGTCTGAACCTCTATGG                | 256-229          | 256                | 70°C         |
| GaJV-1 RNA4-5'Race         | CAAACCTTGAATCATCAACAACACAGGCC               | 196-168          | 196                | 70°C         |
| GaJV-1 RNA5-5'Race         | CCATGCGCGCAAAACCAAAACCCGAACG                | 428-401          | 428                | 70°C         |
| GaJV-1 RNA6-5'Race         | CGAGCTGACAAAACCGGAACGTTGGTGG                | 462-435          | 462                | 70°C         |
| GaJV-1 RNA7-5'Race         | CCCAGTAGGTGAACTCAATAAAGAGGAC                | 353-326          | 353                | 70°C         |
| GaJV-1 RNA8-5'Race         | CGCAAGAATTAGGCTTAATGCAAGAAA                 | 270-244          | 270                | 70°C         |
| GaJV-1 RNA9-5'Race         | CTATCTCCAAACACGTTGACTTCATCGGG               | 300-272          | 300                | 70°C         |
| <b>Gap filling primers</b> |                                             |                  |                    |              |
| CVJ-i31-RNA5-trou-F        | CTTTCAGTGAAGGCTGGCG                         | 942-961          | 864                | 60°C         |
| CVJ-i31-RNA5-trou-R        | TTTAATCGTCAACCGGAGAAAAC                     | 1806-1787        |                    |              |
| 3'polyA anchored PCR       |                                             |                  |                    |              |
| LD-polyT                   | CACTGGCGGCCGCTCGAGCATGTACT <sub>25</sub> NN |                  |                    | 70°C         |
| LD-prim                    | CACTGGCGGCCGCTCGAGCATGTAC                   |                  |                    |              |
| <b>Detection primers</b>   |                                             |                  |                    |              |
| RNA1-CVJ-likeF             | GGAATCAAATCTATGGAAGTTG                      | 1191-1212        | 565                | 56°C         |
| RNA1-CVJ-likeR             | CCGAAAGATCATGCAAATCACC                      | 1755-1734        |                    |              |
| RNA2-CVJ-likeF             | TGTTTCGTTGCCCTTCCCTTG                       | 1201-1220        | 747                | 56°C         |
| RNA2-CVJ-likeR             | GCATCCAGCAAAGGTGTGTTA                       | 1947-1927        |                    |              |
| RNA3-CVJ-likeF             | ACGTTGGAGGATGCGAAAGG                        | 169-188          | 269                | 56°C         |
| RNA3-CVJ-likeR             | CCAAGCATCAAACGGTGACG                        | 437-418          |                    |              |
| RNA4-CVJ-likeF             | CCGGTTTGTGCTATGCTCG                         | 530-548          | 346                | 56°C         |
| RNA4-CVJ-likeR             | CCAGACGCACCACCAATACA                        | 875-856          |                    |              |
| RNA5-CVJ-likeF             | GGTATGCATTCGTCTAGGTC                        | 250-269          | 898                | 56°C         |
| RNA5-CVJ-likeR             | CCTCCTTCCAAACCAACGCT                        | 1147-1128        |                    |              |
| RNA6-CVJ-likeF             | GTTTGCGTGTTTCGTGCTCC                        | 357-375          | 486                | 56°C         |
| RNA6-CVJ-likeR             | GTCCTCGCTTAACATCTTCGT                       | 842-822          |                    |              |
| RNA7-CVJ-likeF             | GTTCTATGGGTAAGGAAATGTC                      | 757-778          | 444                | 56°C         |
| RNA7-CVJ-likeR             | GCACAGAATCAAATCGGGAC                        | 1200-1180        |                    |              |
| RNA8-CVJ-likeF             | CTGGTGGTGTGTCGTCGG                          | 439-456          | 199                | 56°C         |
| RNA8-CVJ-likeR             | CACAAGCCGTCTTCAACAGG                        | 637-618          |                    |              |
| RNA9-CVJ-likeF             | TAAGGCCGGTGTATTCGTGC                        | 328-347          | 429                | 56°C         |
| RNA9-CVJ-likeR             | GCACCAACAACACGCTTACG                        | 756-737          |                    |              |

A)

```

RNA1      -----CACCTACCCAAACGAAAC-----GAAACGAAACGAAACGAAACGAAACAAAAGAAAGCAATT
RNA2      ATTTTGCCTTACTGGACACCTACCCAAACGAAAC-----GAAACGAAACGAAACCGAACCGAAAAGAAAAGAAACGACAT
RNA3      -----CACGAAAC-----GAAACGAAACGAAACCGAAAAGAACAGAACCGAGCACTAAG
RNA A     ----AGCCTTACTGGACACCTACCCAAACGAAAC-----GAAACGAAACGAAACAAACGAAACAGAAACAGAAAATAAAT
RNA B     -----TACTGGACACCTACCGAAACGAAAA-----GAAACGAAACGAAAGAAACGAAACGAAATAAAGCAACC
RNA C     -----AACTGGACACCTACCTAAAATAAAC-----GAAACGAAACGAAACGAAACCGAAACGAAACGAAACTAAGT
RNA9      TTTGTATCTTACTGGACACCTACCGAAACGAAAACAACC GAAACGAAACGAAACGAAACGAAACAAAAGAAATTGTCAGAC

```

B)

```

RNA1      TA-----AT-GTTGGTCGTC-CTGTACGTT-CGTGTACAGGTTGGTG--TTA--TTCACCTTACAGCGATAG-
RNA2      TA--GTTCATTA-AATTTTATTGTTGGTCGTCTCATTCCGTT-CGCGAGTGAGTTGGTG--TTA-CACCAT-----GCGCGC--
RNA3      TA--GTTCATAATATTTTT-AACGTTGATCGTC-CC-GTGCCTGCGTGCATGGGTCTATGGG-----
RNA A     TATTGTTTATTATGTTTTT-ATTGTTGATCGCC-C TTTGGATTTCGTCCAGGGGTCTTTGGGTTA--CCCATTGAGAGCGATA--
RNA B     TATTGTTTATTATGTTTTT-ATTGTTGATCGCC-C TTTGGATTTCGTCCAGGGGTCTTTGGGTTA--CCCATTGAGAGCGCTA--
RNA C     TAT-GTTCATTATGTTTTT-ATCGTTGGTTGCC-C TTTGAAGTTCTGTTCCAGAGGTCGTTGAGTTATCTCAAC-GAGAGCAACAGA
RNA D     TATTGTTTATTATGTTTTT ATTGTTGATCGCC-C TTTGGATTTCGTCCAGGGGGCTTTGGGTTT-CCCATTGAGAGCG-----

```

**Figure S1.** Multiple nucleotide sequence alignments of A) the 5' non coding region (NCR) and B) the 3' NCR of the contig assembled using the sequence data of SRA SRX3209419 for the various genomic segments identified for *Carya*-associated jivivirus 1 (CaJV-1). Residues conserved in all RNA segments are highlighted in yellow.

**A)**

GaJV-2 P3 CFYDMCSLAGVEVPFGVTRVADLDEDAMSALAARKQFKVLLRAYSSINDPRNHVELVRNDATNFKSYIRGPFDFLEQDFYYLVCTSTLHFFNKGNEWKSFHFFS  
GaJV-1 P9 CLARACGKAGVFVPYNIRRVADMSKSALTTL SAMKGFVKLVKAYSQ-KDKRNHIELIGNEAGNFLSKITFPESGGVDDHVL SVT TMQHFFNSSNQWASHKFYA  
CaJV-1 P9 CFSLACRAAGVNVPHVRSVRDMDRDMVAMAAKP-FKVAFFVYAA-DDSRNHVELVPANATNALVHV KPV TSTSHHHRVFVCTTVVQQFFNKG NQWAGYVFYA  
CaJV-2 P9 CFARACRLAGVEVPGIATSVDQLRGDDVTKLSESLDFKV VVTCFGA-DDPRNHIDLVP SGTSNALVSVKPIDVIAQRHYVFAC TTMQQFFNKG NRWYHTKFYA

**B)**

GaJV-1 P9 APGSI RAESV-SGGSANIGGGVSRPRKRVVGA KSGLMFGTAGVKNKYRTTGAILFNNAEELFQDSISR TYAQEIIEEVFDTWGVPM DQPEAA TYAENLLWTFI  
CaJV-1 P9 APESIVEDHVRSGGS-NVSGGVVRSRKRVIPARSTALDG--PVVKNYRTTNAVLFNNVGELFQDSISR EY AQQIIEDLFETWGVPLDQPD AVKYAEDLLWSFL  
CaJV-2 P9 PPESIVGDDVTGGGS-NVSGGVVRSRRRNISAR-ITAVG-VPVAKNYRTTGAVMFNNFDEL FQDKVSRPF AQEIIEATFEAWGVPLDQPD AVKFAEDLLWSFI

VAVTASNKADYNRTYDIPVRPIERNGESVTSVEADFSIFSRI LEAKFGITRRQFSRGVADDLRNFLRH DENQALLPTLATRVGCEPLMAYLAFDGSTHCTGLT  
VSVTASNKADYNRVFDVPVKPIDRGSESVTEVEADFSKLSVLLASKYGLTRRQFARGVADDLRAFLKLEENQLILPQLATRIGCEPLLAYLAFDGSTHCSNMT  
VAVTASNKADYNRVYDIPVRAIKRGGETLNSVDADFAVFSKLL EFGFGVTRRQFARGVSDDLKDFLRREENQALLPTLATRVGCEPLLAYLAFDGSTHCTGLT

TREAAFTRTLEQRNLFERDDENAAGASDRLMQGFGSGSVRSVQPR\*  
SRETTFTKTLFSRNLFERDDVVAQGASDRLMQGMSGGVRAVSSR\*  
TREVTFTRTLESRNLFERDDVLAQGSSDRLMQGVSGGVRSVSVR\*

**Figure S2.** Multiple protein sequence alignments of A) the conserved domain between the P9 proteins of GaJV-1, CaJV-1 and CaJV-2 and the P3 protein of GaJV-2 (MN520750) and B) the C-terminal region of the P9 proteins of GaJV-1, CaJV-1 and CaJV-2. Residues conserved in all proteins are highlighted in yellow.

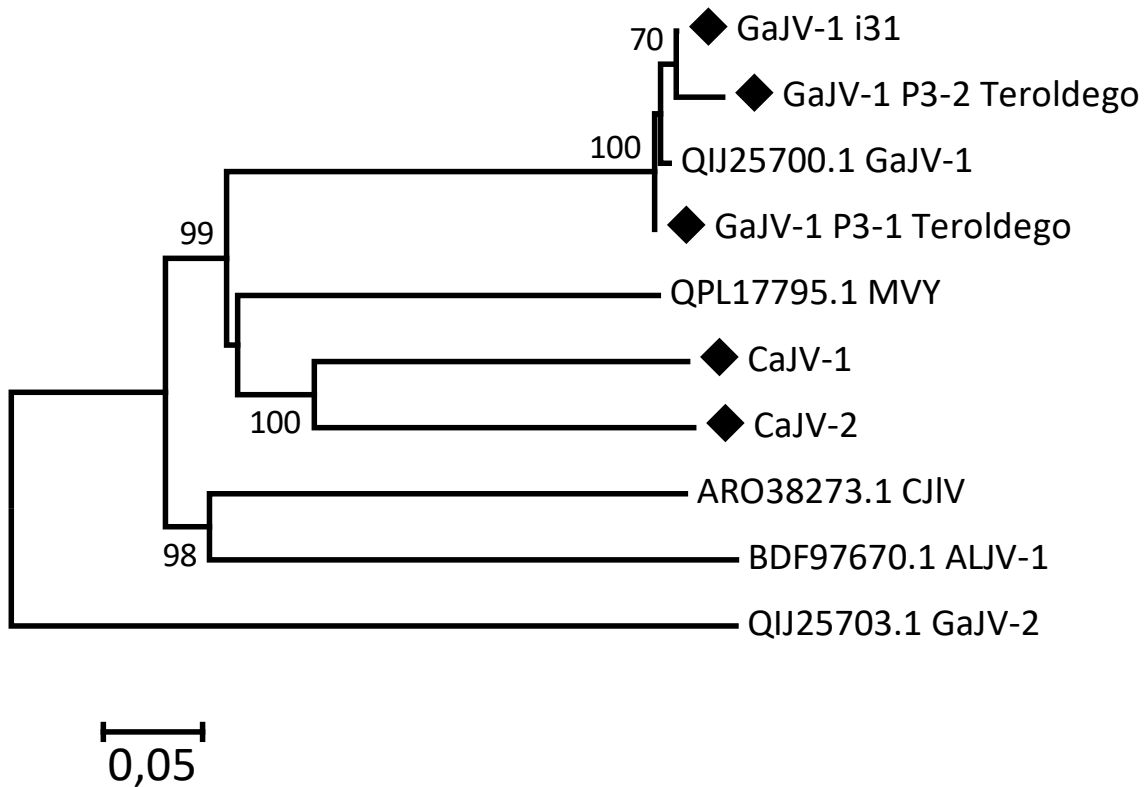

**Figure S3.** Phylogenetic tree reconstructed from the sequences of the P3 proteins of GaJV-1, CaJV-1, CaJV-2 and selected related agents. The tree was reconstructed using the neighbor-joining method and strict amino acid distances. Branch validity was evaluated by bootstrap analysis (1,000 replicates) and only bootstrap values >70% are shown. Sequences determined here are marked by a black diamond. The scale bar represents 5% aa divergence. GaJV-1 (or -2): grapevine-associated jivivirus 1 (or -2); CaJV-1 (or -2): Carya-associated jivivirus 1 (or -2); CJIV: Citrus jingmen-like virus; MVY; Mastic virus Y; ALJV-1: Aspergillus lentulus jivivirus 1.

```

! !** * ! !!! ! ! !* ! ! ! ! !***** * ! *! *! !** * !!* ! !
>GaJV-1 GITRRQFSRGVADDLRNFLRHDENQALLPTLATRVGCEPLMAYLAFDGSSTHCTGLTTREAAFTTRTLEQRNLFERDDENAAGASDRLMQGFSGSVRSVQPR
>CaJV-1 GLTRRQFARGVADDLRAFLKLEENQLILPQLATRIGCEPLLAYLAFDGSSTHCSNMTSRETTFTKTLESRNLFERDDVVAQGASDRLMQGMSSGVRVAVSSR
>CaJV-2 GVTRRQFARGVSDLLKDFLRREENQALLPTLATRVGCEPLLAYLAFDGSSTHCTGLTTREVTFTRTLESRNLFERDDVLAQGSSDRLMQGVSGGVRSVSVR
>Gleditsia sinensis GLTRRQFARGVADDLRITYLKLPEQPLPKLATRIGCEPLLACLAFDGSSTHCTGLTTRETTFTTKTLESRNLFERDDVVAQGASDRLMQGMSSGVRVAVSSR
>Ginkgo biloba GVTRRQFARAVADDLRAFLKKEENQAMLPVIATRVGCEPLLAYLAFDGSSTHCTGMTTREAFTTKTLESRNLFEDDSLMGAGASDKLFQGF-----
>Bletilla striata EVTRRRFARAIADDVRKFIMEPNVRLREMLVTELGVKSEYAGLAFDGSSTHCSGMTSNQVMFTKELERMNLFDEQKVRDKMASNQQLATAGFQVNARRGAYN
>Cenostigma pyramidale GITRRRFSRGVANDLRDFLRHPENQFMLPELATRVGCDPQLAHLAFDGSSTHCSGMTSREVAFTTKTLESRNLFEREDVLAQGASGKLMQGVVE-SRSVVPR
>Selaginella lepidophylla GVTRRQFARAVADDVRVYLMHVENVHLLPELARRAGCDPQMATLVFDGSSTHCSGLTSQEITFTKLLQARNLFEDDSVLADDASARLMQGSVGGARSRVPR
>Ginkgo biloba GVTRRQFARAVADDLRSFLKKEENQAMLPVIATRVGCEPLLAYLAFDGSSTHCTGMTTREAFTTKTLESRNLFEDDSVMGVGASDRLFQGFSGGPRSVVPR
>Lumnitzera littorea GVTRRNFAARGVADDLRLAYLNRTENQFVKTKSAARIYADPQYGDLSFDGSTGCTGMTTSQQRFTKLLEDNRNLYERADVRADGASDILMQGIHGGSRSVVQR
>Ilex paraguariensis GITRRNFARGVANDIRGYLNRPENQFVKSksAERIYADPQYGSLSFDGSTGCLGLTSSERKFTKLLLEDNRNLYERADL-----
>Viola albida GKTRRQFARAIADDQKNFLRHEENKPLLRLATRVGCETLLAYLSFDGSTP-----
>Tectona grandis GVTRRQFARGMADDMRAYIKDPDNTHLRPKLADRAGCDPQMAELAFDGSSTHCTGLTSAQLTFTTRLLESRNLFEDDAVLSQGTSTIMEGIHGHVRSKVQ-
>Viola orientalis GITRRNFARGVADDLRSYLQREGNQFIVSRISQVRGADPQMGTLCFDGSSTHCTGLTTSELFTTKVLEGRNLFERDDVIAEGASGRLFQGMSSGVRSVVPR
>Phalaenopsis aphrodite GITRRNFSCGIADDQRRFLQRPENTHLLPVLATRVGCDPQFATLAFDGSSTHCTGLTSREVGFTKTLKVRNLFESDEMLAPGASDKLLQGMPPAGVRSVVPR
>Iris domestica GITRRNFSCGIADDQRRFLQRPENTHLLPLLATRVGCDPQFATLAFDGSSTHCTGMTSREVGFTKTLKVRNLFESDEMLAPGASDKLLQGMPPAGVRSVVPR
>Persea americana -----ITAAGEENQHILPTLATRIGCEPLMAYLAFDGSSTHCDNLTREVTFTTKTLESRNLFERDDVLAQGSSDRLMQGMSSGVRSVVAPR
>Mangifera indica GVTRRNFAARGAADFMRNFLSRPENQQVKVLAAQVRGADPQYGALCFDGSSTGCSNLSSVHQKFCALLEGRLYEREDLIAEGASDKLMEGIHGSVRSVAPR
>Mangifera indica GITRRNFSRAISDDLREYLNRSNQFIKSKSAQRIGADPQFGALCFDGSSTHCSNLTSSSESTFTTRYLESRNLYERADVIAEGASDALMQGLHGGVRSVVPR
>Cenostigma pyramidale GISRRNFARGIADNLRAYLRRDENQHLLKSLSAQRIGADPQMGDMCFDGSSTGCTSLTSSEASFARLLEARNLYERDDVIAEGASDKLMQGMSSGVRIVPR
>Aquilaria malaccensis GVTRRQLARGLANDFRFLKQEENKYLLPILATRIGCDPQFADLAFDGSSTHCSGMTSREIAFTKILESRNLFEDAVLAAGASDRLMNGVSTSRASKVPR
>Vriesea carinata GVTRRQFARAVADDQHGYIRNEANKFLLPILATRIGCDPQYAHLAFDGSSTHCSGMTSREMTFTRTLESRNLFEDSVLAAGASERLMDGPRVGVSSKVPR
>Bambusa oldhamii GVTRRQFARAIADDMRTFIKDPENIHLLPRLASRVGCDPQMASLGFDSSTHCSNLTAELSFTKLLNLRNLFEDDSLLAEGASQRLMQGMSSGPRSIISR
>Sarcandra glabra GVTRRQFARALADDQRDFLRPLDNKFLPLATRIGCDPQYAHLAFDGSSTHCTNLTREVSFTKTLLESRNLFEDESILAAGASDTLMNGPRVGVSSKVPR
>Ardisia crenata SVTRRQFARGIADALHRYLKQPENAHLLPNLATRVGCDNQLASFAFDGSSTHCTGMTSMEMRFTRLLETRNLFEDDAVLANGASDRLMQGMSSGARSVQTR
>Juniperus ashei GVTRRQFARAVADDLRDYLKHEENQYMLPILATRIGCESLLSDLAFDGSSTHCTGLTTROVAFTTKTLESRNLFERDDVVAQGASERLMQGFSGGVRSIAPR

```

**Figure S4.** Multiple protein sequence alignments of the C-terminal conserved domain of the P9 proteins of GaJV-1, CaJV-1 and CaJV-2 and of proteins encoded by contigs identified by TBLASTN analysis in the transcriptome assembly of various plant species. Residues conserved in all proteins are highlighted in green and an asterisk above the alignment. Residues conserved in >80% of proteins are highlighted in yellow and a ! sign above the alignment. For the various plant species, the contigs used are: *Gleditsia sinensis* (GCKC01203879.1 and GCKC01201897.1); *Ginkgo biloba* (GHLL01078026.1 and GHLL01124537.1); *Bletilla striata* (GGUU01098164.1); *Cenostigma pyramidale* (GIYP01145516.1); *Selaginella lepidophylla* (GIMG01058596.1); *Lumnitzera littorea* (GGFO01008820.1); *Ilex paraguariensis* (GEWR01020459.1); *Viola albida* (GFWC01055794.1); *V. orientalis* (GFXR01028129.1); *Persea americana* (GHOF01010909.1 and GHOF01010909.1); *Tectona grandis* (GFG010201602.1); *Phalaenopsis aphrodite* (JI811267.1); *Iris domestica* (GGPC01141670.1); *Mangifera indica* (HOG01045463.1 and GHOG01041455.1); *Cenostigma pyramidale* (GIYP01566055.1); *Aquilaria malaccensis* (GGS010128087.1); *Vriesea carinata* (GHCB01019885.1); *Bambusa oldhamii* (GJPT01309189.1); *Sarcandra glabra* (GJAT01069010.1); *Ardisia crenata* (GJZC01035951.1) and *Juniperus ashei* (GEWT01000925.1).
